# Supplementary material for: Synthesis, characterization, and evaluation of polymeric surfactants derived from PET plastic waste as green corrosion inhibitor of steel surfaces in marine environment for heavy industry
Source: Royal Society of Chemistry journal article supplement (doi:10.1039/d3ra04518h), 2023-01-01
Supplement: d3ra04518h1.pdf [file d3ra04518h1.pdf]

Supplementary materials (figures)

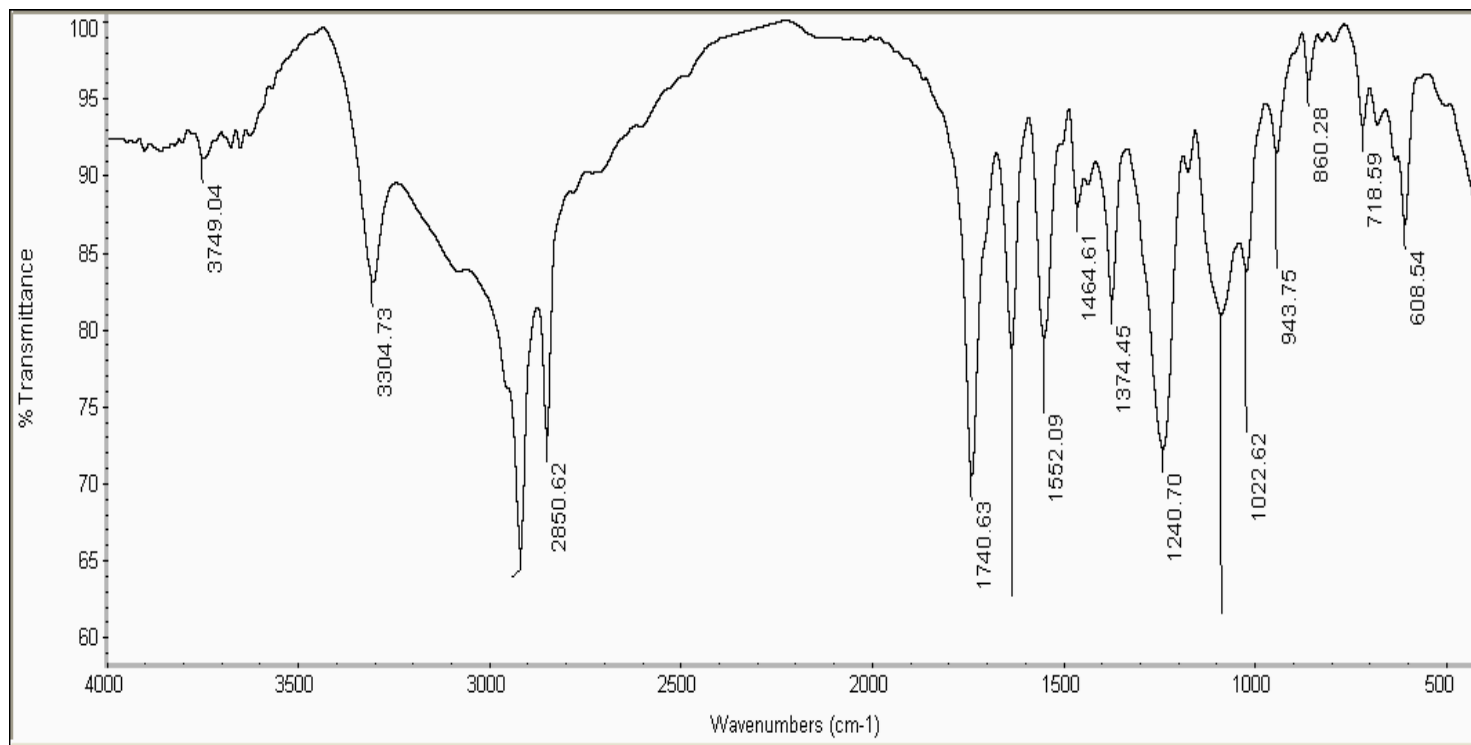

Figure (S1): IR Spectra **(PETPG-OL) ester derivative**

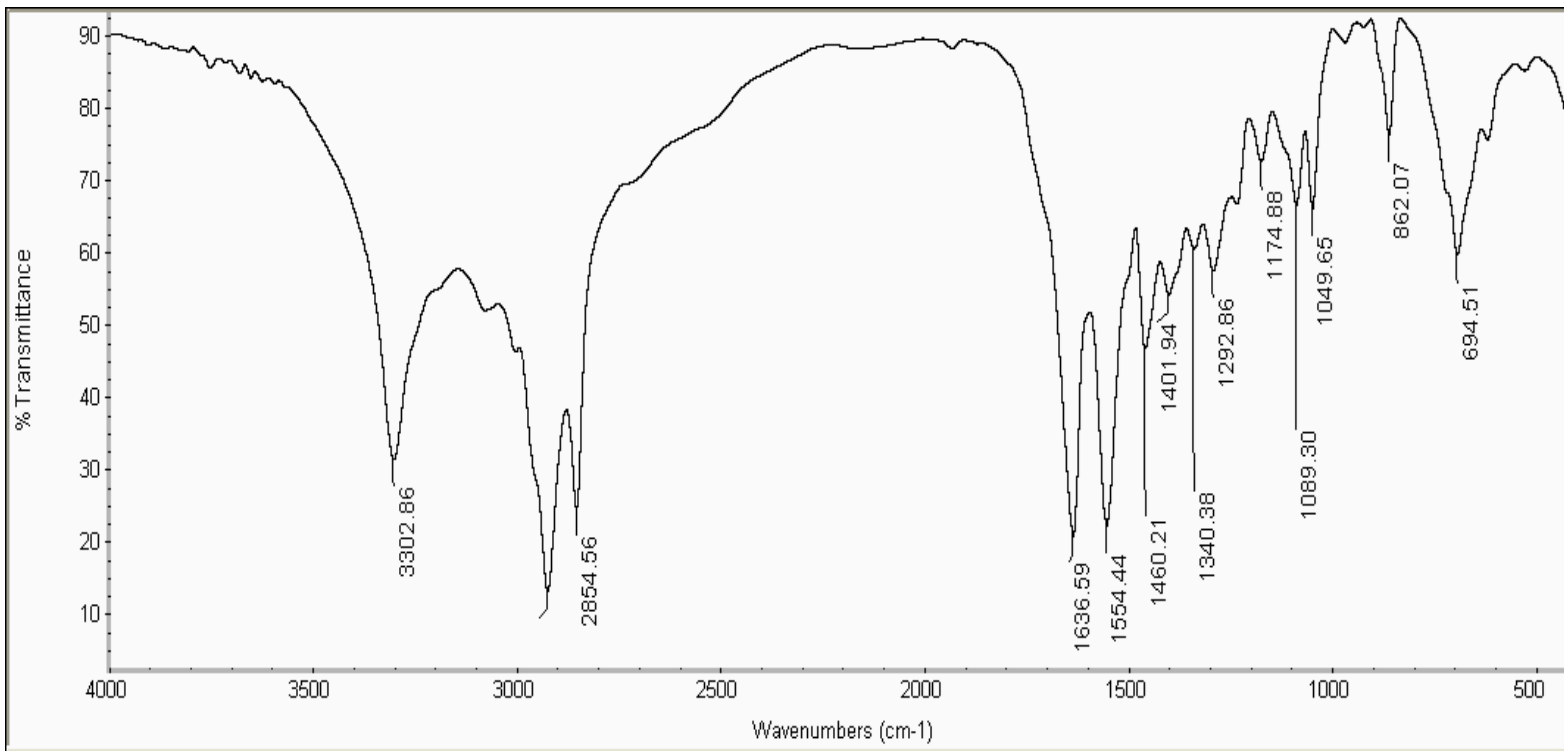

Figure (S2): IR Spectra of (PETAA-OL) amide derivative

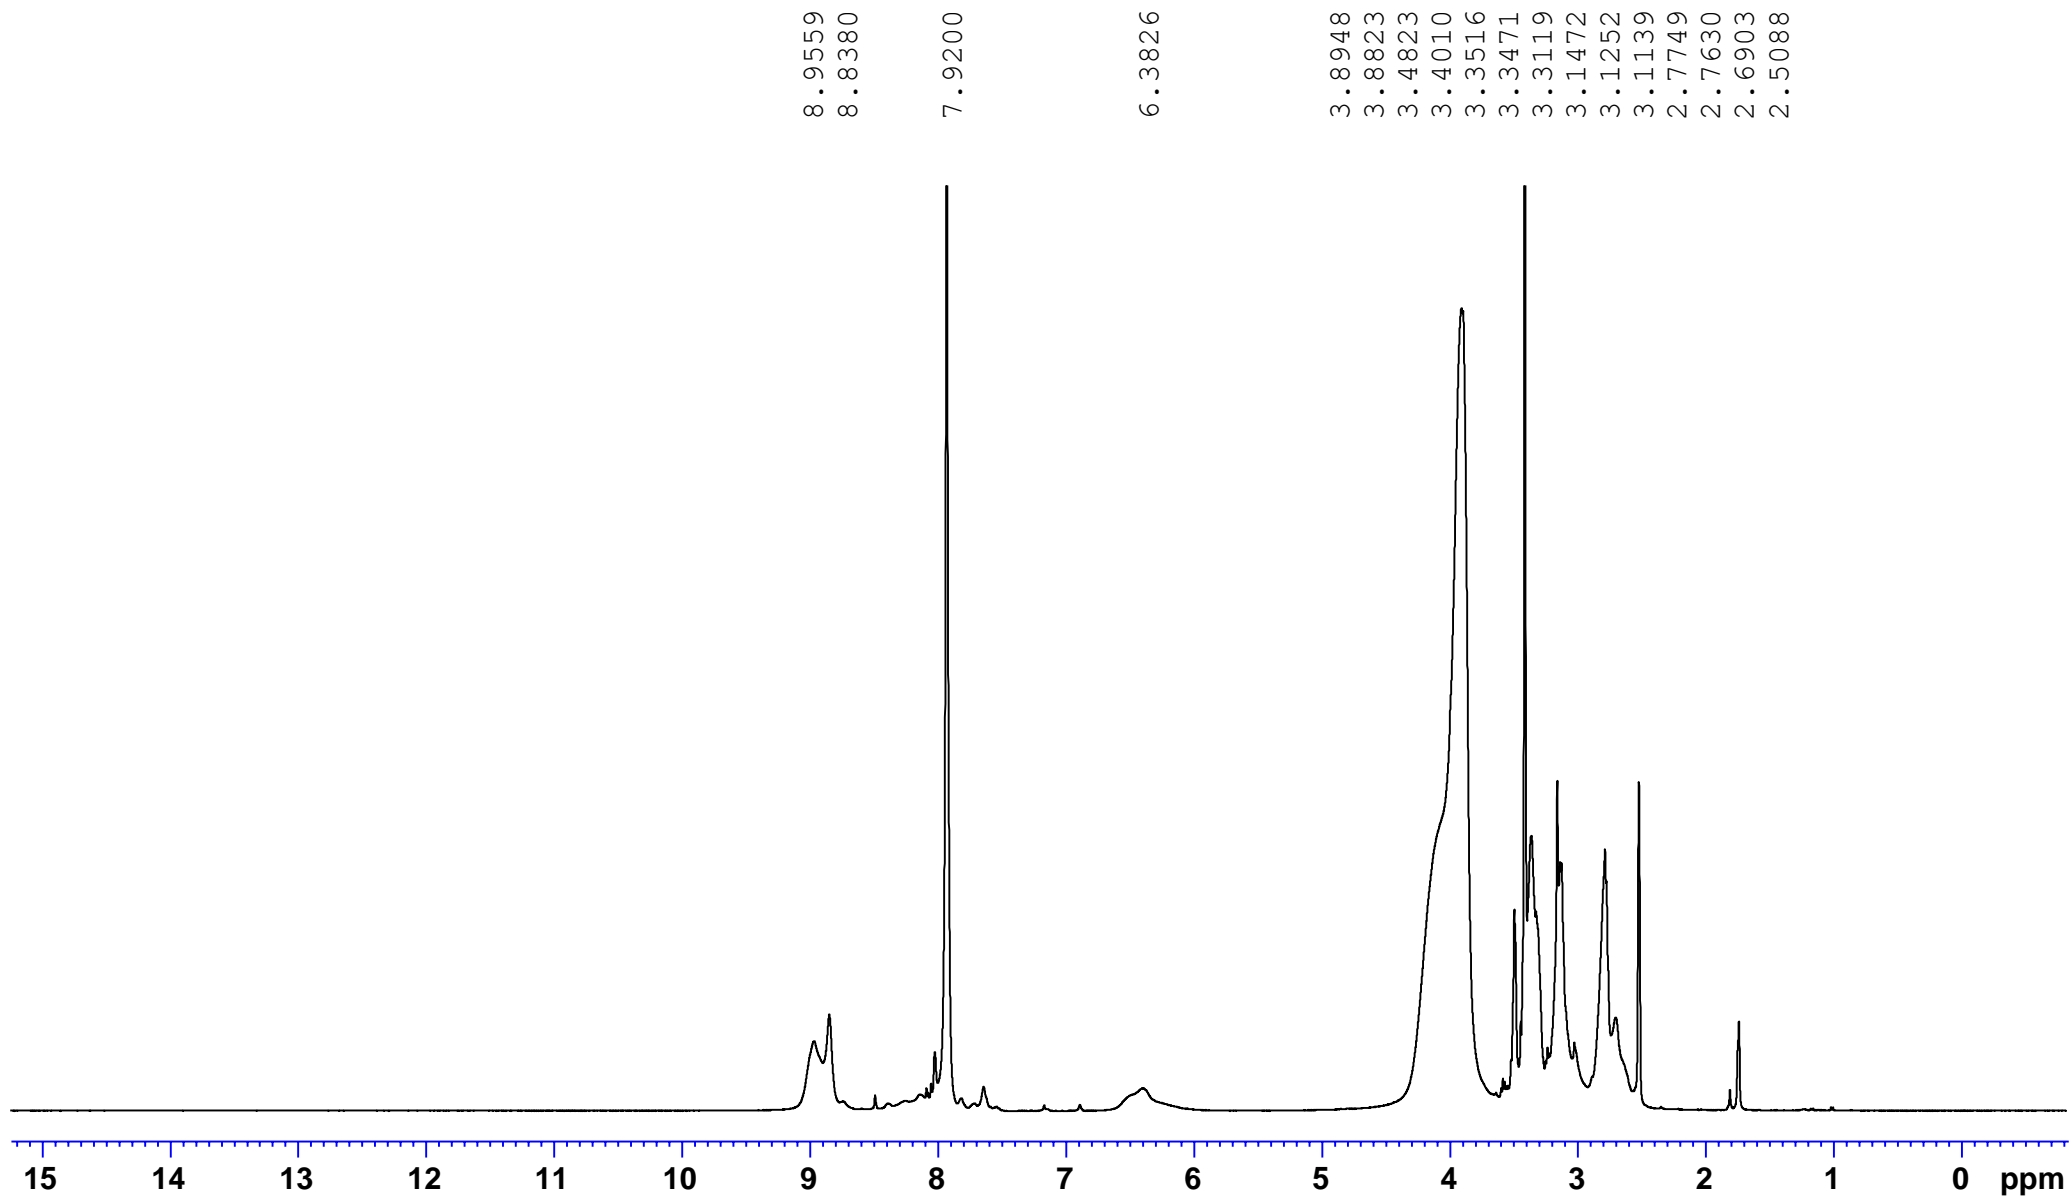

Figure (S3): <sup>1</sup>H NMR analysis of ( PETAA-OL) amide derivative

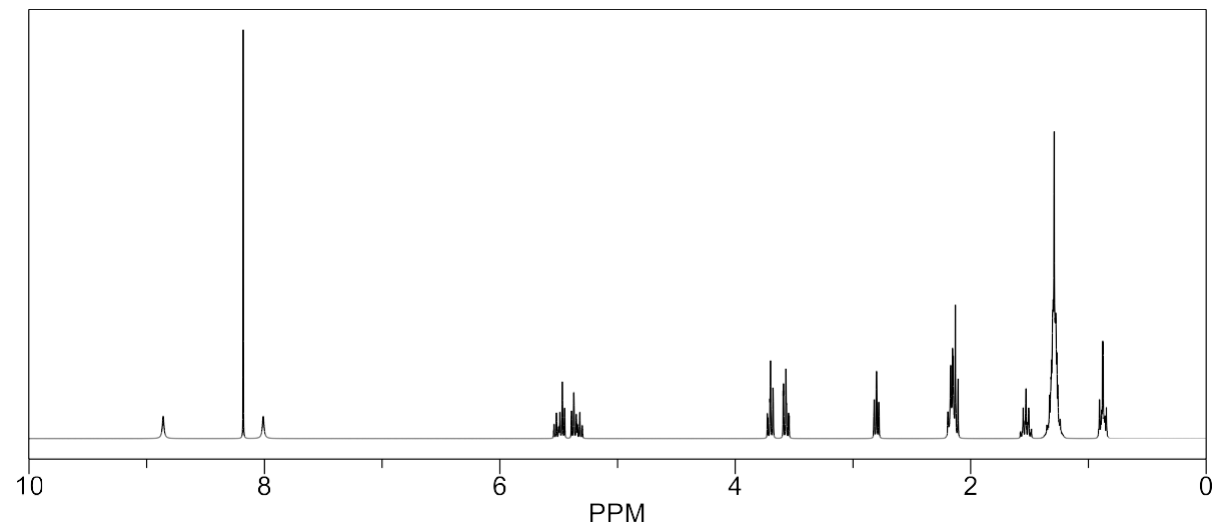

**Figure (S 4):  $^1\text{H}$ NMR analysis of ( PETPG-OL) ester derivative**

**(Table S1)** Effect of inhibitors concentration on steel corrosion characteristics in 3.5 % NaCl solutions determined by weight loss measurements at 303 k.

| Kind of surfactants inhibitors | Glycol based polymer |          |          |          | Amide based polymers |          |          |          |
|--------------------------------|----------------------|----------|----------|----------|----------------------|----------|----------|----------|
|                                | PETPG                |          | PETPG-OL |          | PETAA                |          | PETAA-OL |          |
|                                | I.E. %               | $\theta$ | I.E. %   | $\theta$ | I.E. %               | $\theta$ | I.E. %   | $\theta$ |
| <b>Blank</b>                   | -                    | -        | -        | -        | -                    | -        | -        | -        |
| 50                             | 81.9                 | 0.819    | 83.5     | 0.835    | 85.3                 | 0.853    | 87.6     | 0.876    |
| 100                            | 82.3                 | 0.823    | 84.5     | 0.845    | 87.4                 | 0.874    | 89.8     | 0.898    |
| 150                            | 83.4                 | 0.834    | 85.3     | 0.853    | 89.6                 | 0.896    | 91.2     | 0.912    |
| 200                            | 84.5                 | 0.845    | 86.2     | 0.862    | 90.7                 | 0.907    | 92.3     | 0.923    |
